# Supplementary material for: Participatory development of a framework to actively involve people living with dementia and those from their social network, and healthcare professionals in conducting a systematic review: the DECIDE-SR protocol
Source: PubMed Central journal article supplement (PMC10337195; doi:10.1186/s40900-023-00461-2), 2023-07-11
Supplement: 40900_2023_461_MOESM1_ESM.pdf [file 40900_2023_461_MOESM1_ESM.pdf]

GRIPP2 short form

| Section and Topic                   | Item                                                                                                                                      | Reported on page No |
|-------------------------------------|-------------------------------------------------------------------------------------------------------------------------------------------|---------------------|
| 1: Aim                              | Report the aim of PPI in the study                                                                                                        | 6                   |
| 2: Methods                          | Provide a clear description of the methods used for PPI in the study                                                                      | 7-12                |
| 3: Study results                    | Outcomes—Report the results of PPI in the study, including both positive and negative outcomes                                            | 12                  |
| 4: Discussion and conclusions       | Outcomes—Comment on the extent to which PPI influenced the study overall. Describe positive and negative effects                          | 12-14               |
| 5: Reflections/critical perspective | Comment critically on the study, reflecting on the things that went well and those that did not, so others can learn from this experience | 12-14               |

PPI=patient and public involvement
